# Supplementary material for: Impact of tissue transport on PET hypoxia quantification in pancreatic tumours
Source: Springer Nature journal article supplement (doi:10.1186/s13550-017-0347-3), 2017-12-01
Supplement: MOESM1 [file 15329140]

Impact of tissue transport on PET hypoxia quantification in pancreatic tumours  
Online Resource 1

| patient        | $r[k_3, \text{TBR}(1 \text{ hr})]$ | $r[k_3, \text{TBR}(2 \text{ hrs})]$ | $r[k_3, \text{TBR}_{\text{corrected}}(1 \text{ hr})]$ | $r[k_3, \text{TBR}_{\text{corrected}}(2 \text{ hrs})]$ | $v_d$       |
|----------------|------------------------------------|-------------------------------------|-------------------------------------------------------|--------------------------------------------------------|-------------|
| 1              | -0.20                              | -0.29                               | 0.75                                                  | 0.53                                                   | 0.90        |
| 2              | 0.00                               | 0.23                                | 0.87                                                  | 0.81                                                   | 0.74        |
| 3              | 0.47                               | 0.15                                | 0.84                                                  | 0.52                                                   | 0.96        |
| 4              | -0.32                              | -0.52                               | 0.73                                                  | 0.35                                                   | 0.98        |
| 5              | 0.15                               | -0.23                               | 0.77                                                  | 0.44                                                   | 0.97        |
| 6              | -0.10                              | 0.02                                | 0.75                                                  | 0.62                                                   | 0.76        |
| 7              | 0.48                               | 0.17                                | 0.89                                                  | 0.06                                                   | 0.74        |
| 8              | 0.04                               | 0.55                                | 0.91                                                  | 0.88                                                   | 0.85        |
| 9              | -0.12                              | 0.02                                | 0.84                                                  | 0.88                                                   | 0.80        |
| 10             | 0.14                               | 0.17                                | 0.94                                                  | 0.93                                                   | 0.86        |
| 11             | 0.20                               | 0.37                                | 0.73                                                  | 0.77                                                   | 0.98        |
| 12             | -0.34                              | -0.05                               | 0.64                                                  | 0.83                                                   | 0.94        |
| 13             | 0.36                               | 0.59                                | 0.92                                                  | 0.68                                                   | 0.77        |
| 14             | 0.56                               | 0.45                                | 0.84                                                  | 0.65                                                   | 1.00        |
| 15             | -0.06                              | -0.25                               | 0.87                                                  | 0.30                                                   | 0.68        |
| 16             | 0.20                               | -0.40                               | 0.71                                                  | -0.08                                                  | 0.92        |
| 17             | 0.45                               | -0.15                               | 0.71                                                  | 0.22                                                   | 0.76        |
| 18             | -0.58                              | -0.56                               | 0.39                                                  | 0.50                                                   | 0.84        |
| 19             | 0.72                               | 0.01                                | 0.92                                                  | 0.50                                                   | 0.79        |
| 20             | 0.16                               | 0.01                                | 0.85                                                  | 0.72                                                   | 0.79        |
| <b>AVERAGE</b> | <b>0.10</b>                        | <b>0.01</b>                         | <b>0.80</b>                                           | <b>0.52</b>                                            | <b>0.85</b> |

TABLE S1: Pearson correlation coefficients  $r$  between the voxel-scale FAZA trapping rate  $k_3$  and the tumour-to-blood ratio (TBR) and corrected  $\text{TBR}_{\text{corrected}}$  tumour-to-blood ratios calculated from compartment modelling of the two- and one-hour data sets. Also shown are the average of the voxel-scale distribution volumes in each tumour. Population averages over all patients are shown at the bottom in bold font.
