# Supplementary material for: Impact of tissue transport on PET hypoxia quantification in pancreatic tumours
Source: Springer Nature journal article supplement (doi:10.1186/s13550-017-0347-3), 2017-12-01
Supplement: MOESM2 [file 15329140]

# Impact of tissue transport on PET hypoxia quantification in pancreatic tumours

## Online Resource 2

### SENSITIVITY ANALYSIS OF THE FAZA BINDING AND EQUILIBRATION RATES

Here we assess the impact on the choice of threshold  $M$  used to distinguish binding from equilibrium using Eq. (19) in the main text.  $M = 1$  would have been the appropriate choice if our data was noise-free. This would pick out the lowest value of  $k_3$  in each  $v_d$  bin and associate it with the equilibration contribution  $K_{\text{eq}} = k_{\text{eq}}(1 - v_d)/v_d$  to the trapping rate  $k_3$ . On the other hand, there is noise in our data arising from intrinsic PET noise as well as uncertainties associated with our model fitting. For this reason, we must choose a value for the cutoff that is greater than one. Increasing  $M$  beyond one, the estimate of  $k_{\text{eq}}$  is expected to increase, while that for  $k_b$  will decrease, since the sum  $k_b + K_{\text{eq}} = k_3$  is fixed. When  $M$  is equal to the bin size  $N_b = 10$ ,  $k_b$  will be zero since no values of  $k_3$  are apportioned to binding.

In Fig. 1, we show the effect of varying  $M$  between one and  $N_b = 10$  on the estimated values of  $k_{\text{eq}}$  and  $k_b$  for three patients. Patients 1 and 2 are the same as used in Fig. 2 in the main text. They represent normoxic and modestly hypoxic tumours, respectively, as estimated by the binding rate. We also show the sensitivity analysis for patient 13, since this was the most hypoxic tumour in our study. As expected,  $K_{\text{eq}}$  mostly increases with increasing  $M$  while  $k_b$  decreases nearly linearly. Assuming as much, the relative error for the binding rate is

$$\frac{\Delta k_b}{k_b} \simeq \frac{(\Delta M)}{N_b - 4} \quad (1)$$

for the threshold choice  $M = 4$ . Here,  $k_b$  is defined as the value of the binding rate determined for this choice of threshold and  $\Delta M$  is the estimated error on the threshold choice. If the latter is  $\pm 1$ , the relative error on the binding rate is 33%.

The choice of bin size  $N_b$  is not important for our sensitivity analysis. The bin size must be substantially larger than one to absorb statistical fluctuations, while at the same time, be much smaller than the total number of voxels  $N$  in order to deduce the  $v_d$ -dependence of  $k_3$ . As long both these conditions are satisfied, the above results hold for any choice of  $N_b$ , but with the threshold choice  $M$  scaled to accommodate the new choice; see Eq. (20) in the main text.

---

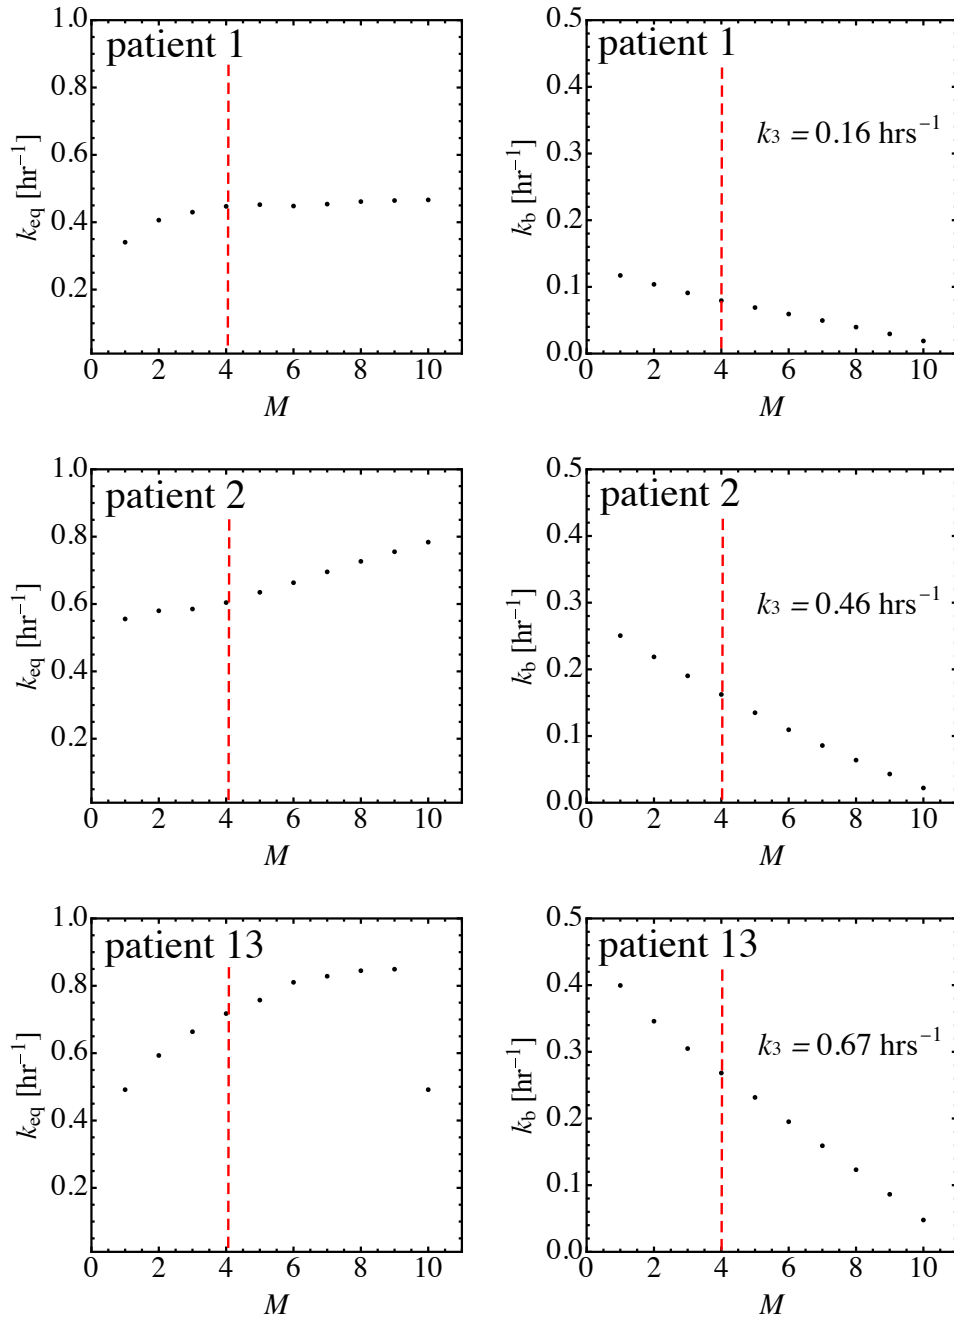

FIG. 1: Effect of threshold size  $M$  on the average of the voxel-scale equilibration ( $k_{\text{eq}}$ ) and binding ( $k_b$ ) rates for three different patients. The vertical dashed red line indicates our choice of threshold,  $M = 4$ . Patient 1 (top) represents a tumour of low hypoxia as determined by  $k_b$ ; Patient 13 (bottom) was the most hypoxic tumour studied. The average trapping rate values  $k_3$  in each of the tumours are shown.
